# Supplementary material for: Data as a Resource for Designing Digitally Enhanced Consumer Packaged Goods
Source: MDPI journal article supplement (doi:10.3390/mti6110101), 2022-11-17
Supplement: s1 [file s1]

Archive with 2 entries (2 files):
- mti-1945193-Supplementary Materials S1.pdf
- mti-1945193-Supplementary Materials S2.pdf
