# Supplementary figures and images for: Data as a Resource for Designing Digitally Enhanced Consumer Packaged Goods
Source: MDPI journal article supplement (doi:10.3390/mti6110101), 2022-11-17

## Data Visualisations for Salt

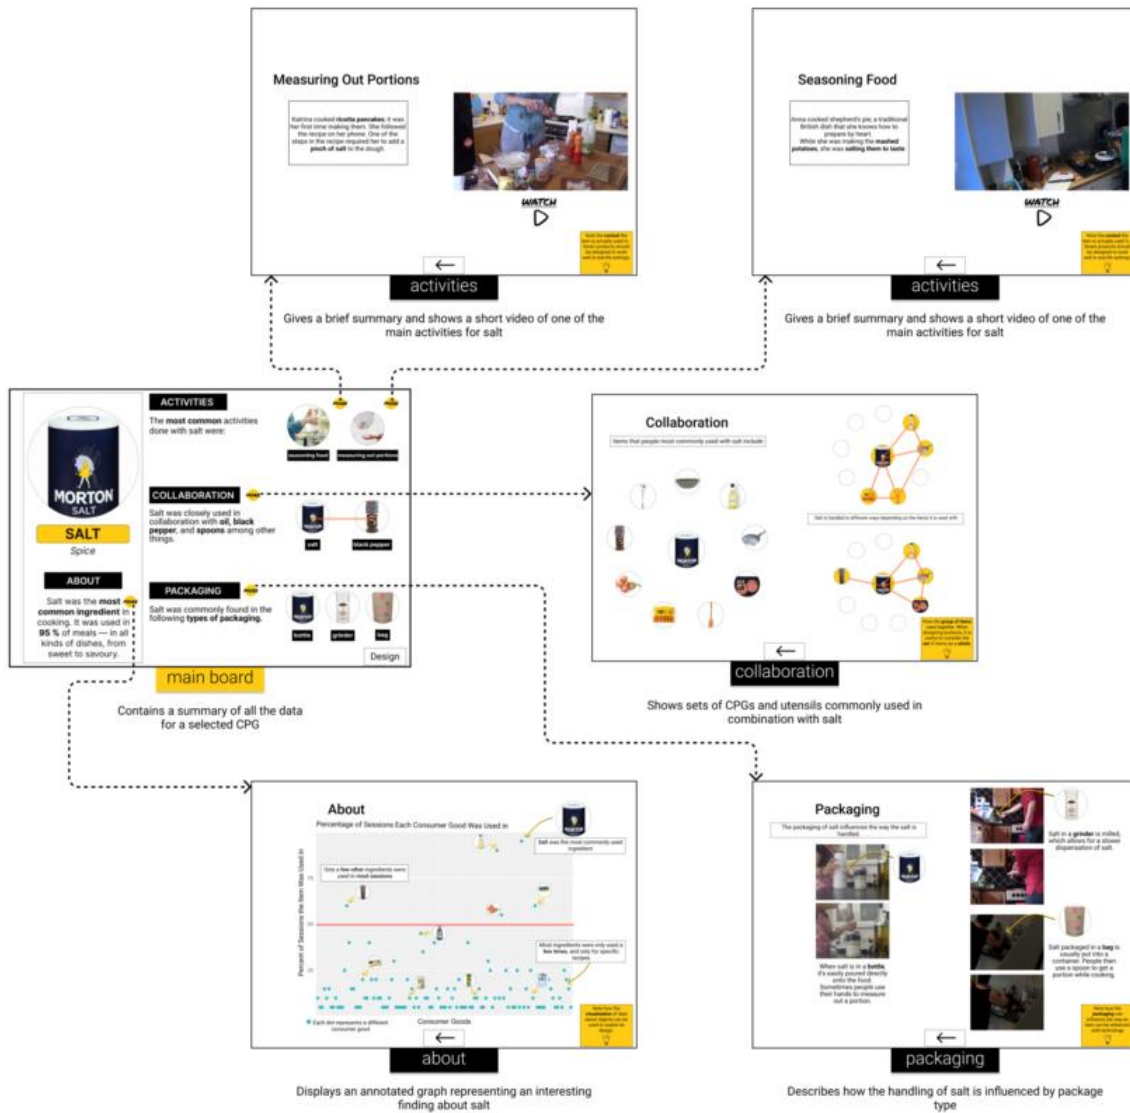

Figure S7. Data visualisation for salt.

Supplement: s1 [file s1]
